# Supplementary material for: Electrochemical chiral recognition of tryptophan enantiomers by using chiral polyaniline and β-CD-MOF
Source: Royal Society of Chemistry journal article supplement (doi:10.1039/d4nr02854f), 2024-01-01
Supplement: d4nr02854f1.pdf [file d4nr02854f1.pdf]

## Supplementary Information

### Electrochemical chiral recognition of tryptophan enantiomers by using chiral polyaniline and $\beta$ -CD-MOF

Jiamin Liang<sup>[1]</sup>, Yuxin Song<sup>[1]</sup>, Huan Xing<sup>[1]</sup>, Liang Ma<sup>[1]</sup>, Fengxia Wang<sup>[1]</sup>, Mingfang Zhang<sup>[1]</sup>, Hongli Zhang<sup>[2]\*</sup>, Gang Zou<sup>[2]\*</sup> and Guang Yang<sup>[1]\*</sup>

<sup>[1]</sup>*Department of Chemistry and Chemical engineering, College of Chemistry, Chemical Engineering and Resource Utilization, Northeast Forestry University, Hexing Road 26, Harbin 150040, P. R. China.*

<sup>[2]</sup>*Key Laboratory of Precision and Intelligent Chemistry, School of Chemistry and Materials Science, University of Science and Technology of China, Hefei, Anhui, China.*

\*Corresponding Author:

Guang Yang, E-mail: guangyang@nefu.edu.cn; gangzou@ustc.edu.cn; zh11992@ustc.edu.cn

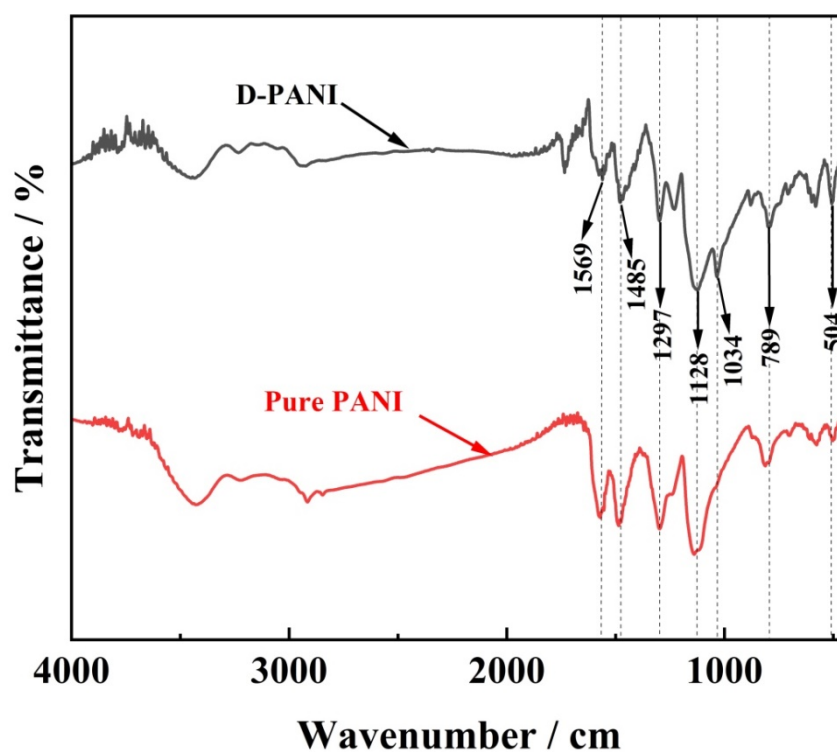

**Fig. S1** The FT-IR spectra of D-PANI (black line) and pure PANI (red line).

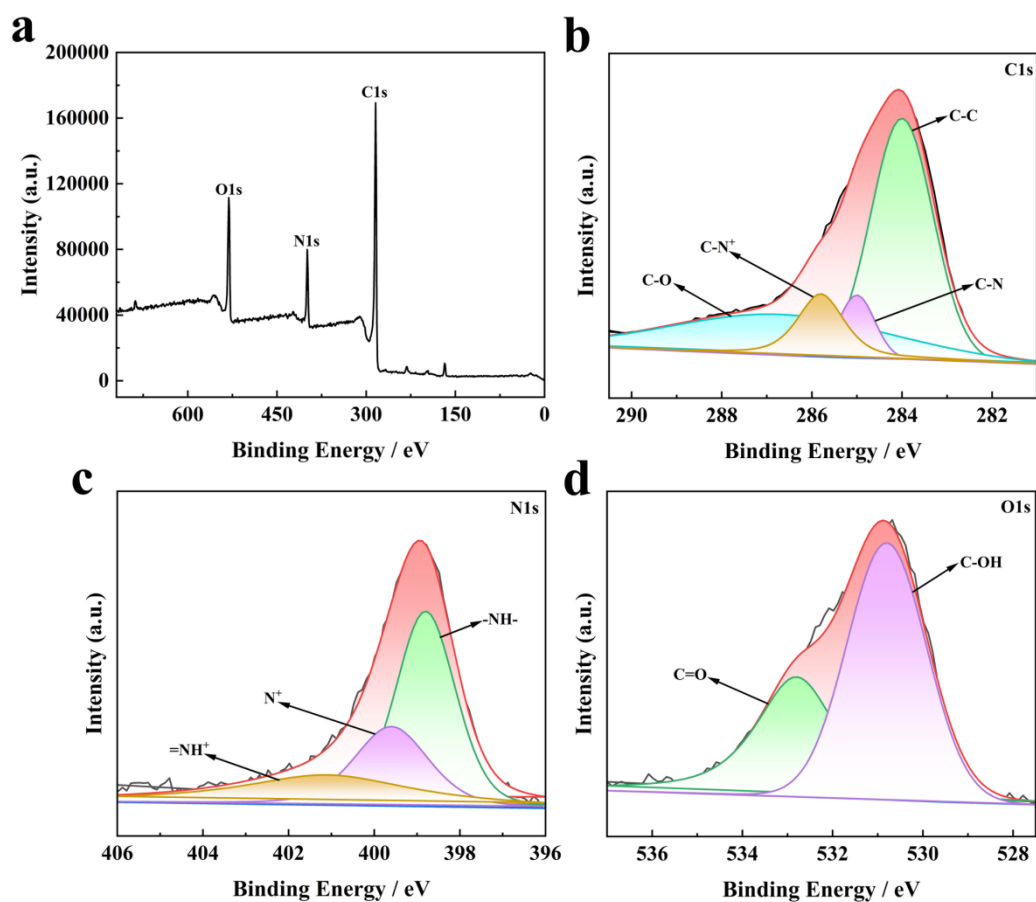

**Fig. S2** (a) The wide survey XPS spectra (b) C1s (c) N1s and (d) O1s of PANI.

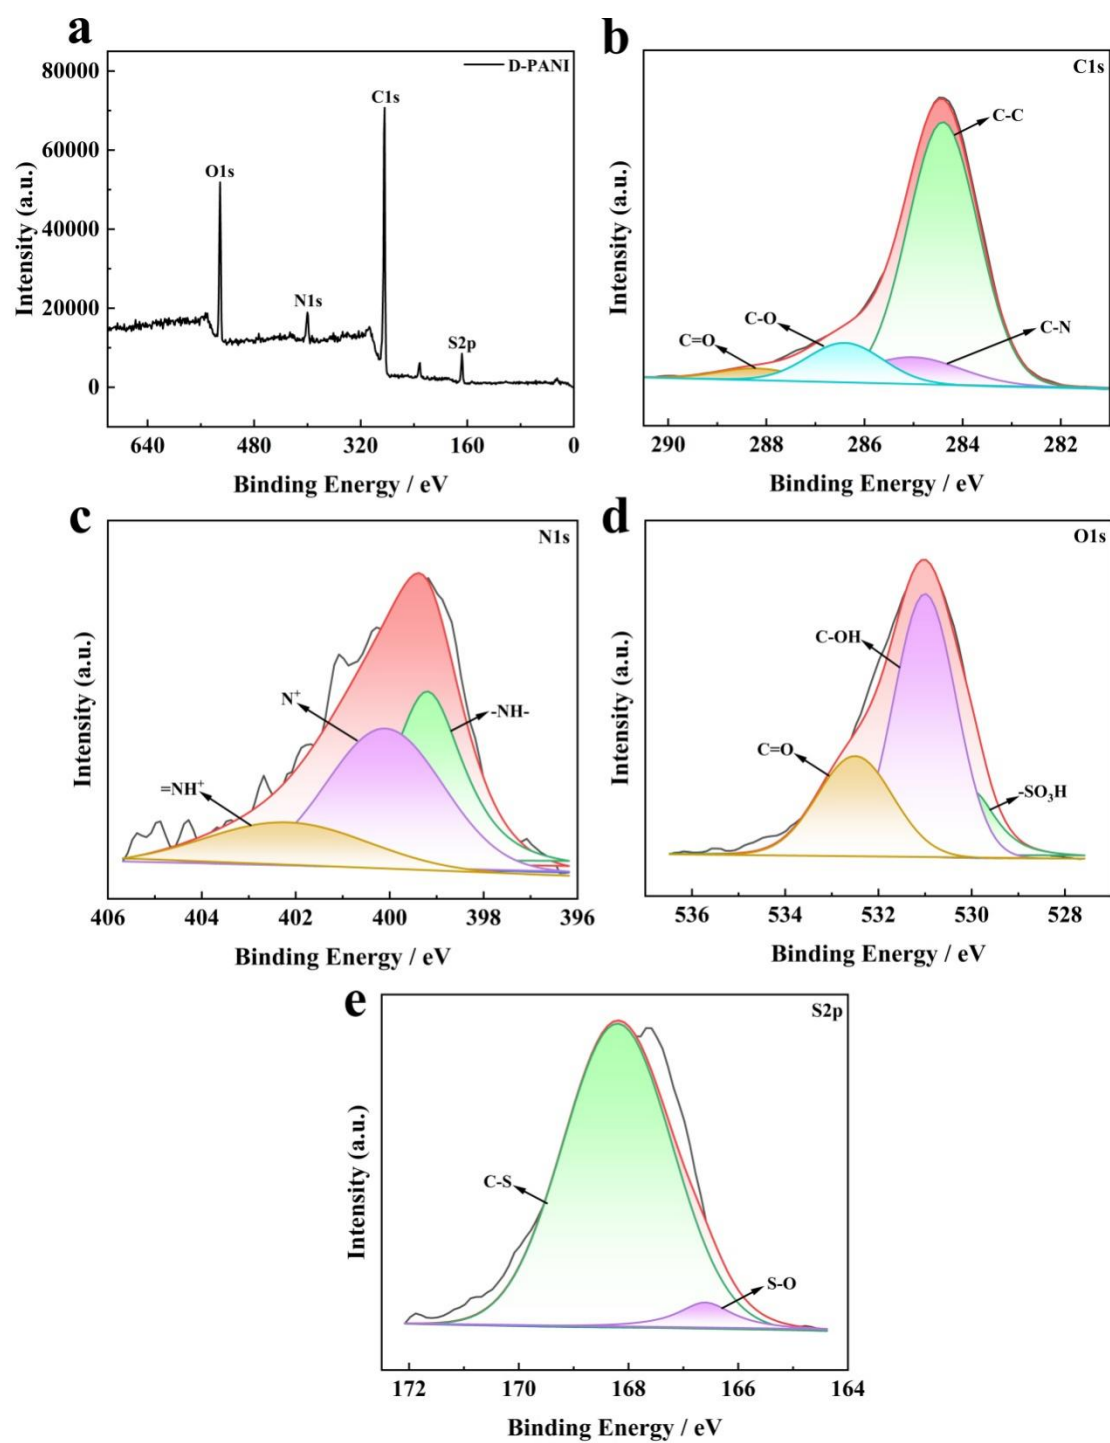

**Fig. S3** (a) The wide survey XPS spectra (b) C1s (c) N1s (d) O1s and (e) S2p of D-PANI.

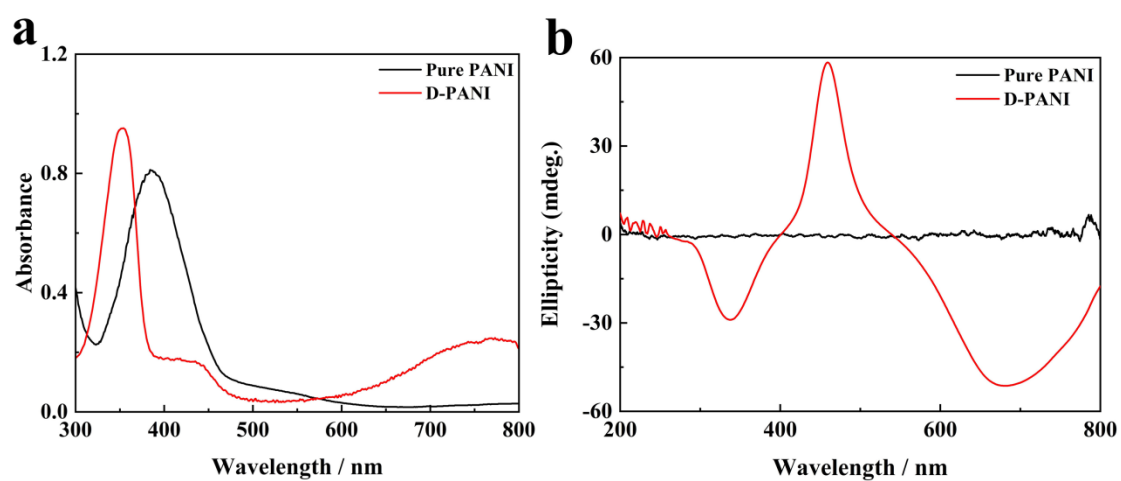

**Fig. S4** (a) The UV-vis spectra and (b) CD spectra of pure PANI (black line) and D-PANI (red line).

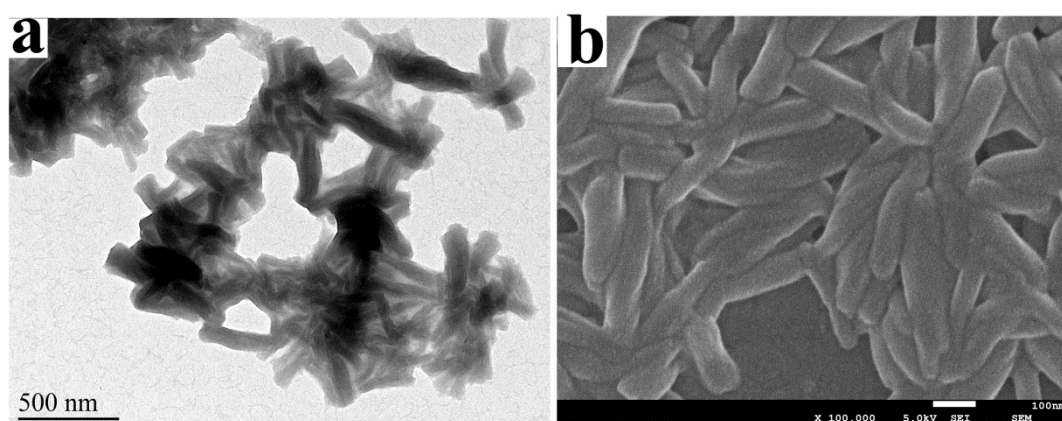

**Fig. S5** The (a) TEM and (b) SEM image of D-PANI.

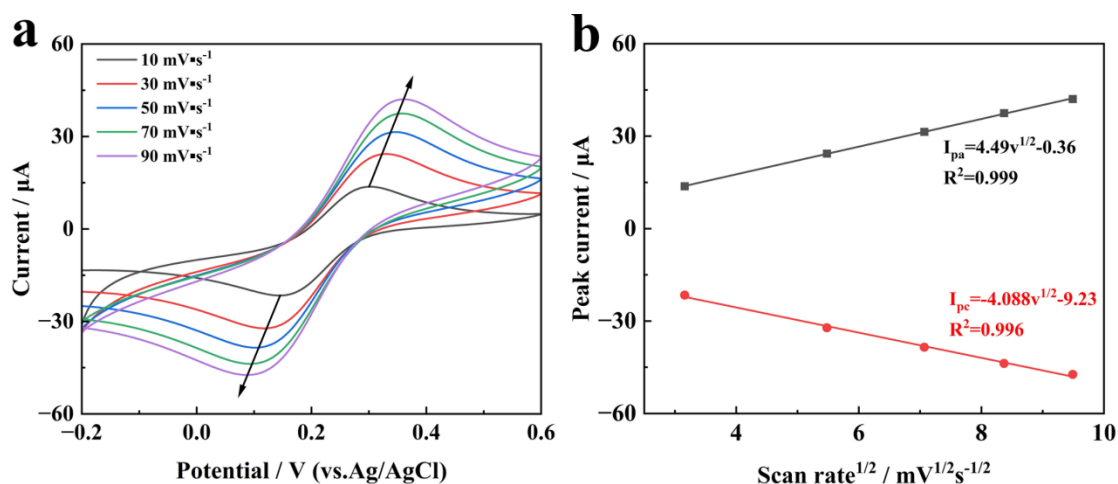

**Fig. S6** (a) The CVs of bare GCE in 1 mM  $[\text{Fe}(\text{CN})_6]^{3-/4-}$  containing 0.1 M KCl at increasing scan rates: 10, 30, 50, 70 and 90  $\text{mV s}^{-1}$ . (b) The peak currents as a function of scan rate for the determination of the effective working surface area.

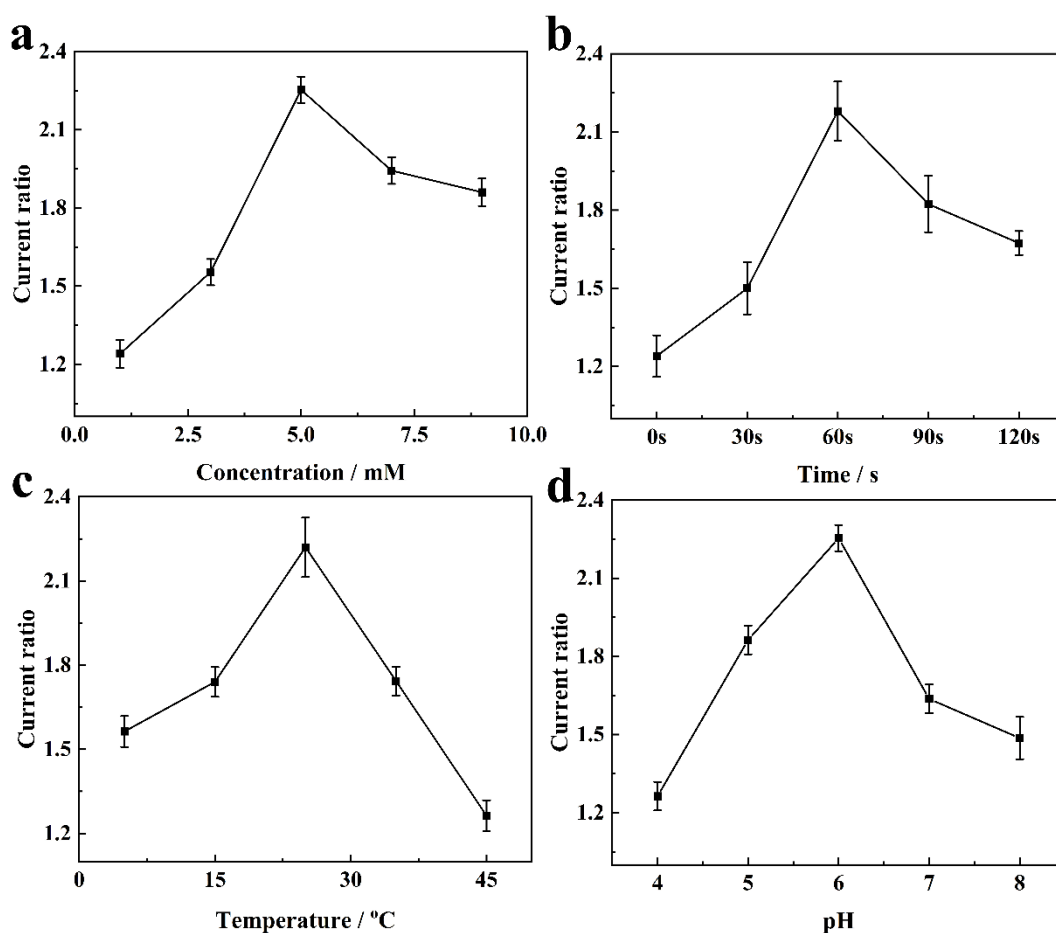

**Fig. S7** Influence of (a) concentration of Trp isomers, (b) incubation time, (c) temperature and (d) solution pH value on the DPV response of the GCE/ $\beta$ -CD-MOF/D-PANI towards Trp isomers detection.

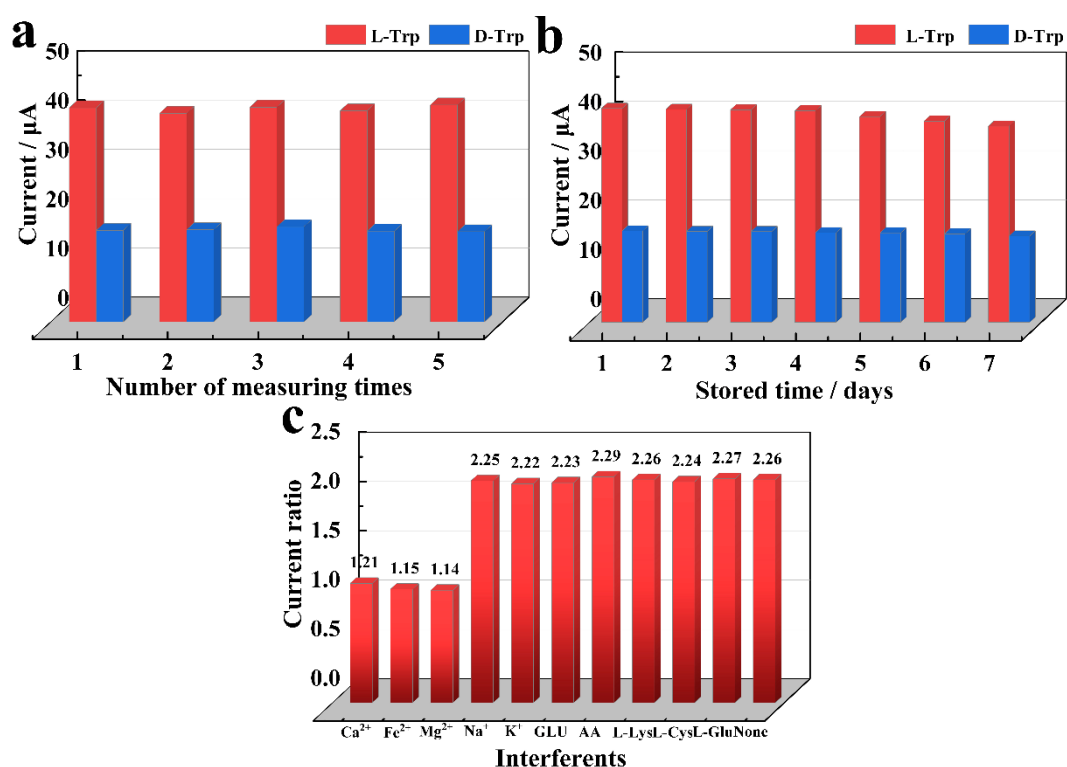

**Fig. S8** The reproducibility, stability and anti-interference ability of the GCE/ $\beta$ -CD-MOF/D-PANI: (a) The current of five independent DPV measurements for the discrimination of Trp enantiomers; (b) The current of modified electrode was stored in a refrigerator for seven days; (c) The current ratio ( $I_L/I_D$ ) of GCE/ $\beta$ -CD-MOF/D-PANI without and with the interfering material of 5 mM ( $\text{Ca}^{2+}$ ,  $\text{Fe}^{2+}$ ,  $\text{Mg}^{2+}$ ,  $\text{Na}^+$ ,  $\text{K}^+$ , glucose (GLU), ascorbic acid (AA), L-lysine (L-Lys), L-cysteine (L-Cys), and L-glutamic (L-Glu)).

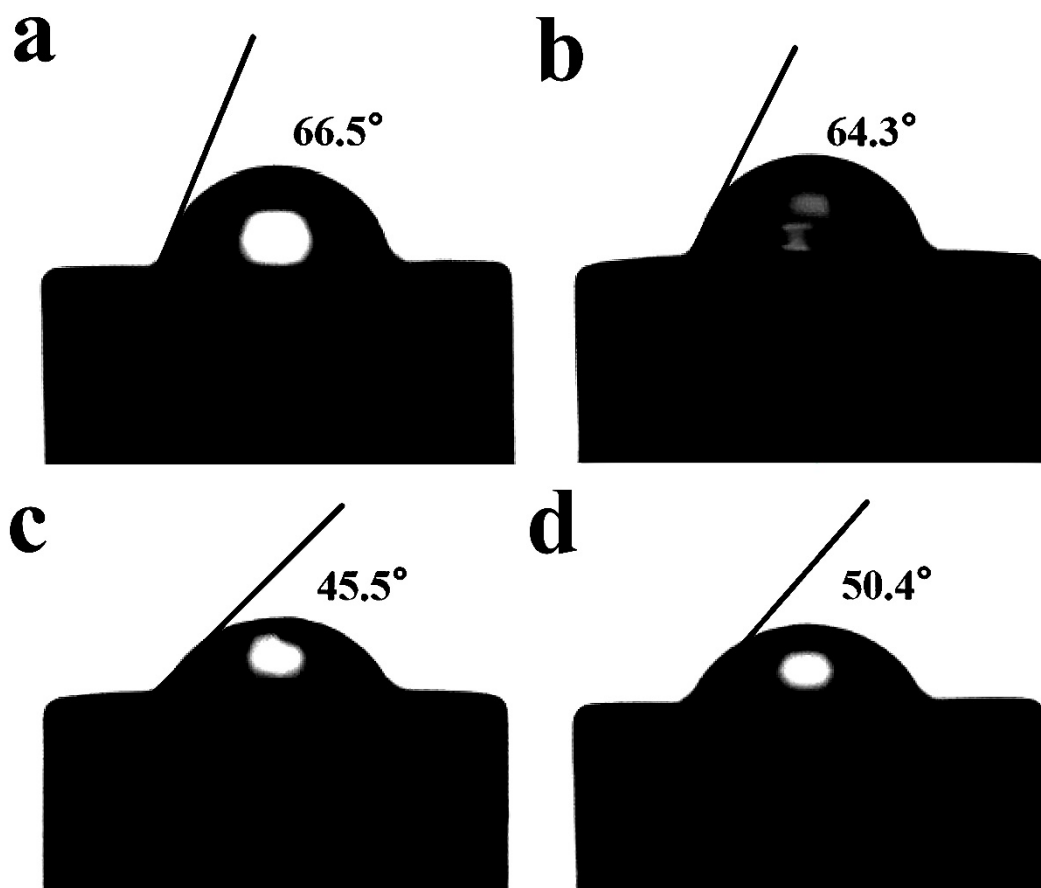

**Fig. S9** The photographs of water droplet shape of different electrodes: (a) bare GCE, (b) GCE/ $\beta$ -CD-MOF/D-PANI, (c) GCE/ $\beta$ -CD-MOF/D-PANI dipped in L-Trp solution and (d) GCE/ $\beta$ -CD-MOF/D-PANI dipped in D-Trp solution.

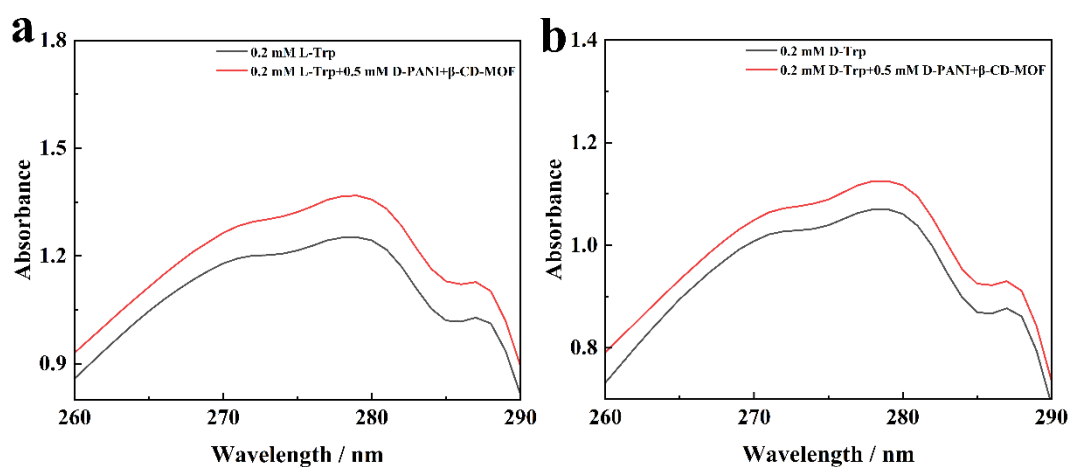

**Fig. S10** UV-vis spectra of (a) L-Trp and (b) D-Trp before and after incorporation with  $\beta$ -CD-MOF+D-PANI (0.5 mM).

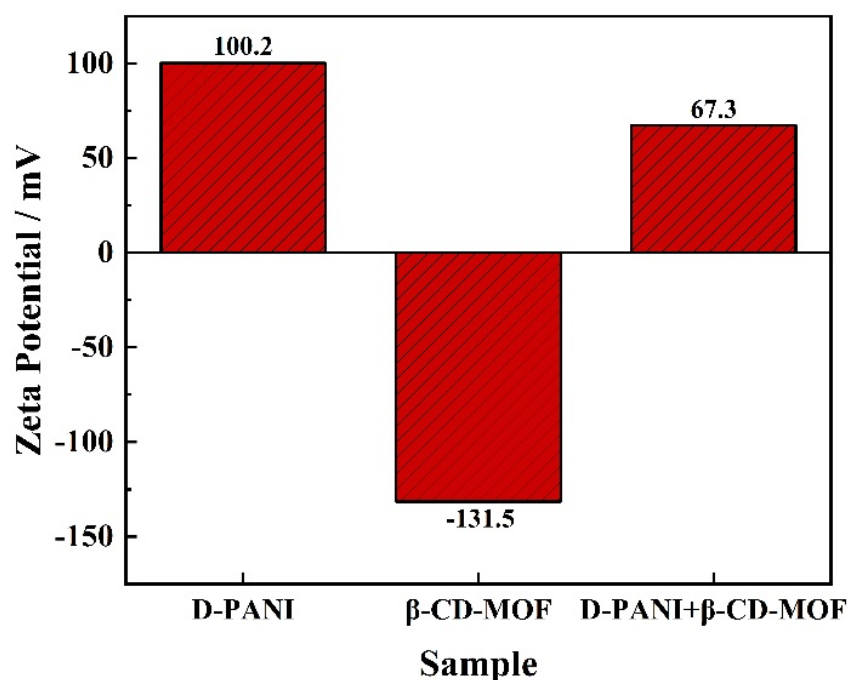

**Fig. S11** The zeta potential values for D-PANI, β-CD-MOF and D-PANI+β-CD-MOF.

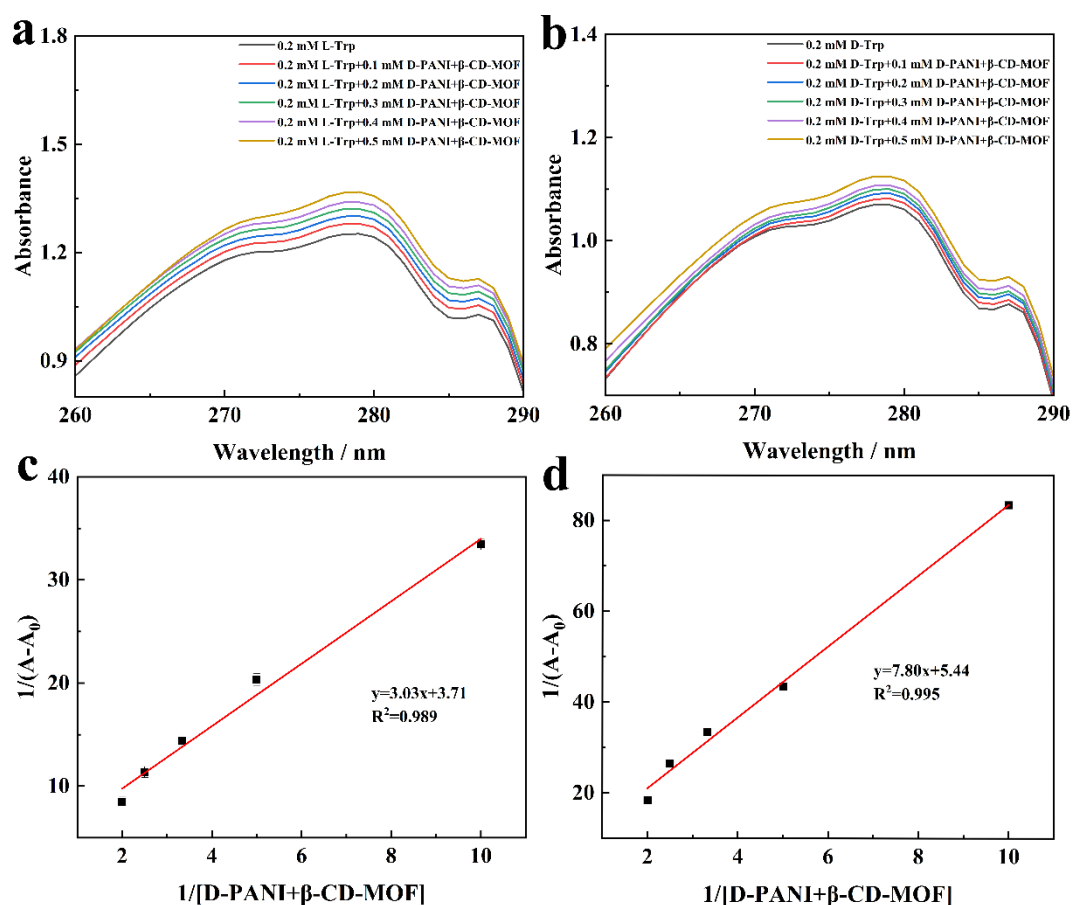

**Fig. S12** The UV spectra of 0.2 mM L-Trp (a) and D-Trp (b) after addition of β-CD-MOF+D-PANI of various concentrations. Double reciprocal plots of L-Trp (c) and D-Trp (d) contained β-CD-MOF+D-PANI.

**Table S1** Detection of L-Trp in actual samples (n=6)

| Sample      | CL <sup>a</sup> (μM) | Added (μM) | Founded (μM) | RSD (%) | Recovery (%) |
|-------------|----------------------|------------|--------------|---------|--------------|
| Human urine | 2.2                  | 0.5        | 2.79±0.103   | 3.7     | 103.3        |
|             |                      | 1.0        | 3.13±0.135   | 4.3     | 97.8         |
|             |                      | 10.0       | 12.28±0.381  | 3.1     | 100.6        |
|             |                      | 50.0       | 53.18±2.180  | 4.1     | 101.9        |

<sup>a</sup> L-Trp content in real samples.**Table S2** Detection of D-Trp in actual samples (n = 6)

| Sample      | CD <sup>b</sup> (μM) | Added (μM) | Founded (μM) | RSD (%) | Recovery (%) |
|-------------|----------------------|------------|--------------|---------|--------------|
| Human urine | 3.1                  | 0.5        | 3.69±0.166   | 4.5     | 102.5        |
|             |                      | 1.0        | 4.25±0.135   | 3.3     | 103.7        |
|             |                      | 10.0       | 12.73±0.535  | 4.2     | 97.2         |
|             |                      | 50.0       | 52.73±1.951  | 3.7     | 99.3         |

<sup>b</sup> D-Trp content in real samples.
